# Supplementary material for: Co3O4/RGO/Co3O4 pseudocomposite grown in situ on a Co foil for high-performance supercapacitors
Source: Royal Society of Chemistry journal article supplement (doi:10.1039/c6ra17543k), 2016-01-01
Supplement: c6ra17543k1.pdf [file c6ra17543k1.pdf]

## **Supplementary Information**

### **Co<sub>3</sub>O<sub>4</sub>/RGO/Co<sub>3</sub>O<sub>4</sub> pseudocomposite *in-situ* growth on Co foil for high-performance supercapacitors**

Shengqi Wang, Peiwen Ju, Zhaoqiang Zhu, Chongjun Zhao\*

*Key Laboratory for Ultrafine Materials of Ministry of Education, Shanghai Key Laboratory of Advanced*

*Polymeric Materials, School of Materials Science and Engineering, East China University of Science and*

*Technology, Shanghai 200237, P.R. China, Tel: +86-21-6425 0838, Fax: +86-21-6425 0838, E-mail:*

[chongjunzhao@ecust.edu.cn](mailto:chongjunzhao@ecust.edu.cn)

#### **\* Corresponding author:**

Chongjun Zhao

Key Laboratory for Ultrafine Materials of Ministry of Education,

Shanghai Key Laboratory of Advanced Polymeric Materials,

School of Materials Science and Engineering

East China University of Science and Technology

Shanghai 200237, P.R. China

Tel: 0086-21-6425 0838

Fax: 0086-21-6425 0838

E-mail:

[chongjunzhao@ecust.edu.cn](mailto:chongjunzhao@ecust.edu.cn)

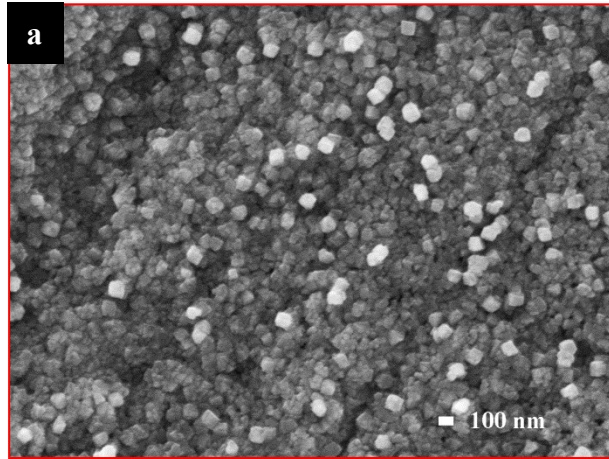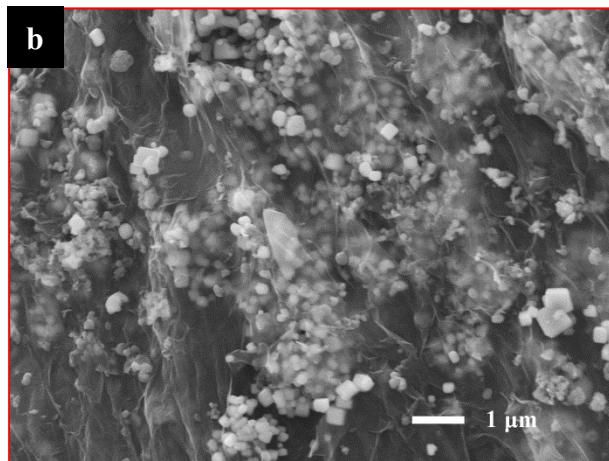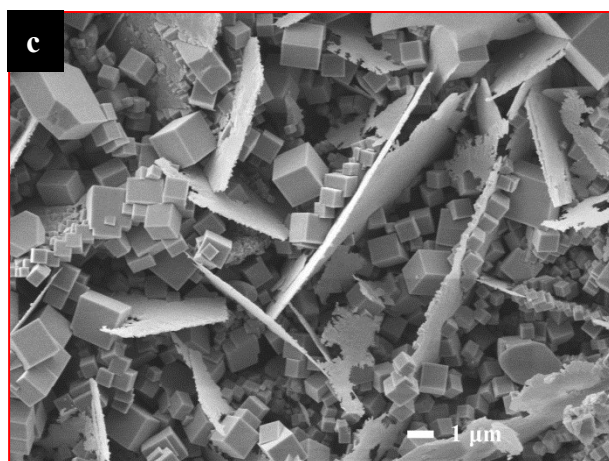

**Fig.S1.** SEM image of (a)  $\text{Co}_3\text{O}_4@\text{Co}$ , (b)  $\text{Co}_3\text{O}_4/\text{Co}_3\text{O}_4@\text{Co}$ , (c)  $\text{RGO}/\text{Co}_3\text{O}_4@\text{Co}$

electrodes

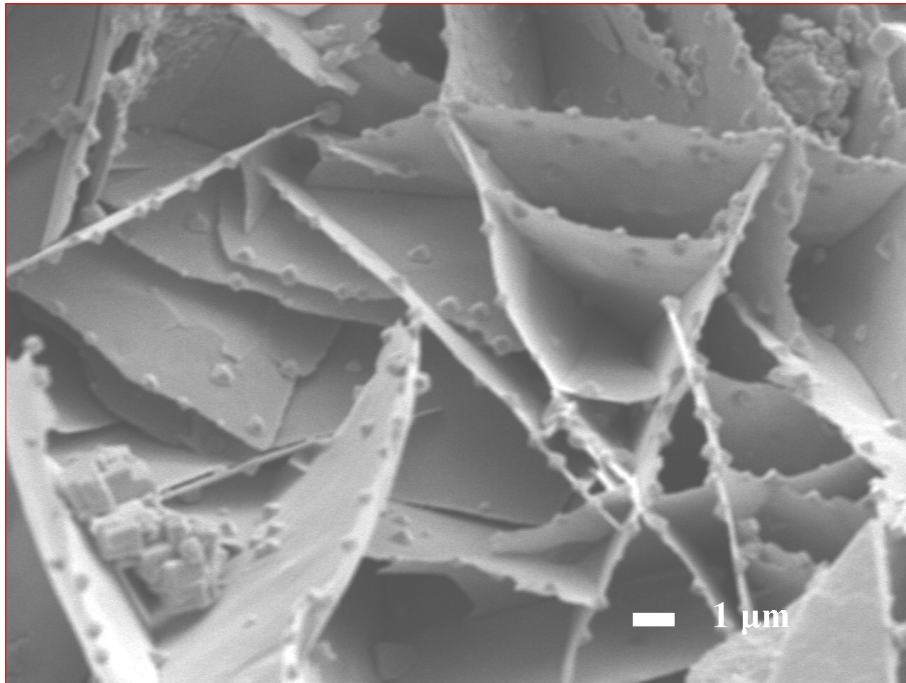

**Fig.S2.** SEM image of CRC@Co electrode after 2000 cycles
